# Supplementary material for: The influence of the aortic valve angle on the hemodynamic features of the thoracic aorta
Source: PubMed Central journal article supplement (PMC4999809; doi:10.1038/srep32316), 2016-08-26
Supplement: srep32316-s1.pdf [file srep32316-s1.pdf]

**The influence of the aortic valve angle on the hemodynamic features of the thoracic  
aorta**

**Hojin Ha,<sup>1</sup> Guk Bae Kim,<sup>2</sup> Jihoon Kweon,<sup>3</sup> Sang Joon Lee,<sup>1,4</sup> Young-Hak Kim,<sup>3</sup> Namkug Kim,<sup>5,6,†</sup> and Dong Hyun Yang<sup>6,†,\*</sup>**

<sup>1</sup>POSTECH Biotech Center, Pohang University of Science and Technology, San 31, Hyoja-dong, Pohang 790-784, South Korea

<sup>2</sup>Asan Institute of Life Science, Asan Medical Center, University of Ulsan College of Medicine, 388-1 Poongnap-dong, Songpa-gu, Seoul 138-736, South Korea

<sup>3</sup>Department of Cardiology, University of Ulsan College of Medicine, Asan Medical Center, 388-1 Poongnap-dong, Songpa-gu, Seoul 138-736, South Korea

<sup>4</sup>Department of Mechanical Engineering, Pohang University of Science and Technology (POSTECH), San 31, Hyoja-dong, Pohang 790-784, South Korea

<sup>5</sup> Department of Convergence Medicine, University of Ulsan College of Medicine, Asan Medical Center, 388-1 Poongnap-dong, Songpa-gu, Seoul 138-736, South Korea

<sup>6</sup> Department of Radiology, University of Ulsan College of Medicine, Asan Medical Center, 388-1 Poongnap-dong, Songpa-gu, Seoul 138-736, South Korea

**Criteria for submission:** Original Articles

Submitted to *Scientific reports*

**\*Corresponding author:** Prof. Dong Hyun Yang

Assistant Professor, Department of Radiology

University of Ulsan College of Medicine/Asan Medical Center

Tel.: +82-02-3010-6573; Email: donghyun.yang@gmail.com

†These authors contributed equally to this work.

**Running title:** Effect of the aortic flow angle on hemodynamic features

**Number of words:** 4009 words (not including abstract, Methods, References, and Figure Legends)

**Number of figures and tables:** 9 figures and 1 table

A

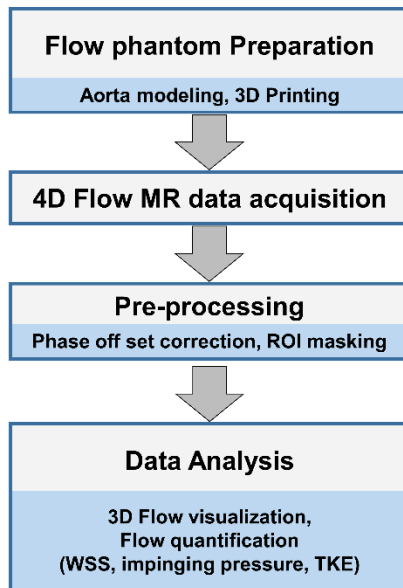

B

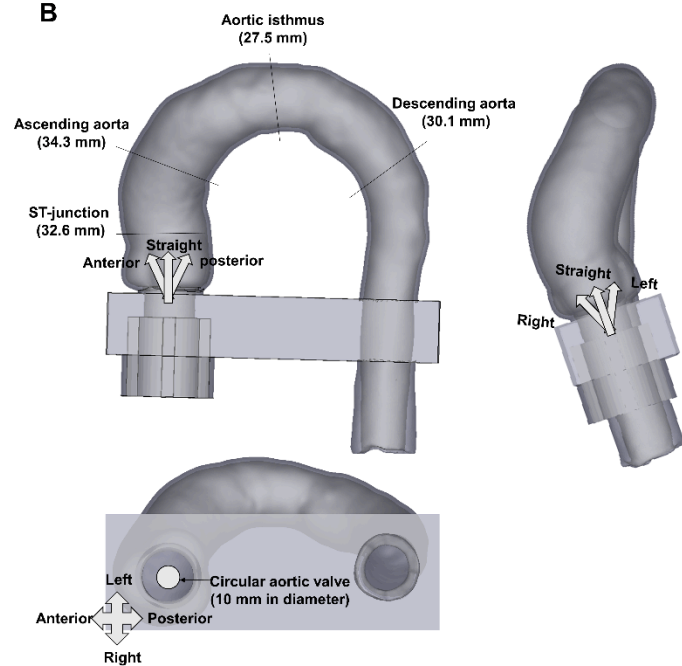

**Figure S1.** Schematics for the *in vitro* 4D PC-MRI experiments. (A) Experimental procedures and (B) *in vitro* aorta model with various aortic flow angles.

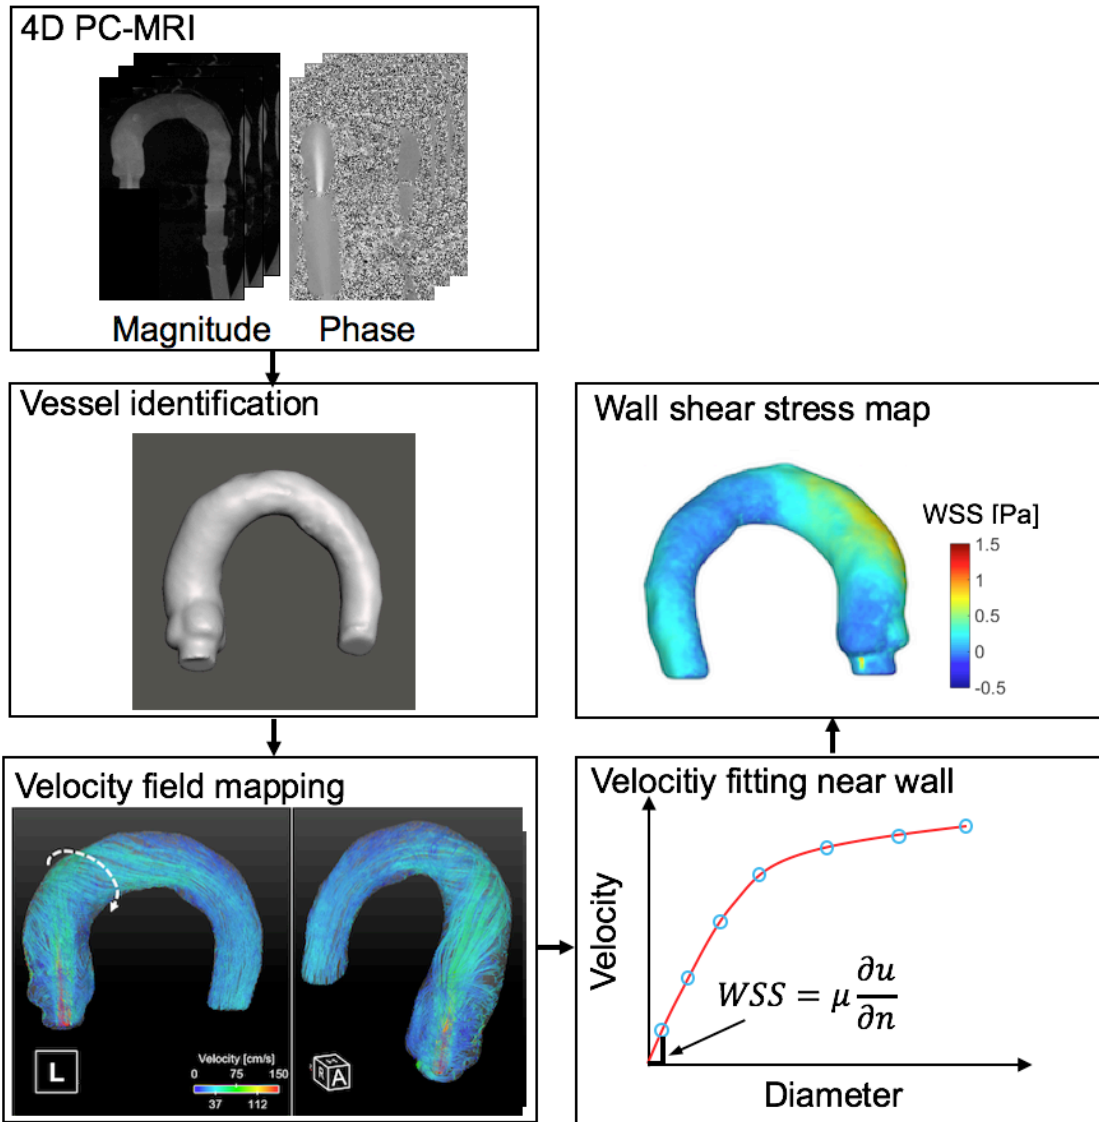

**Figure S2.** Schematic diagram for wall shear stress quantification.

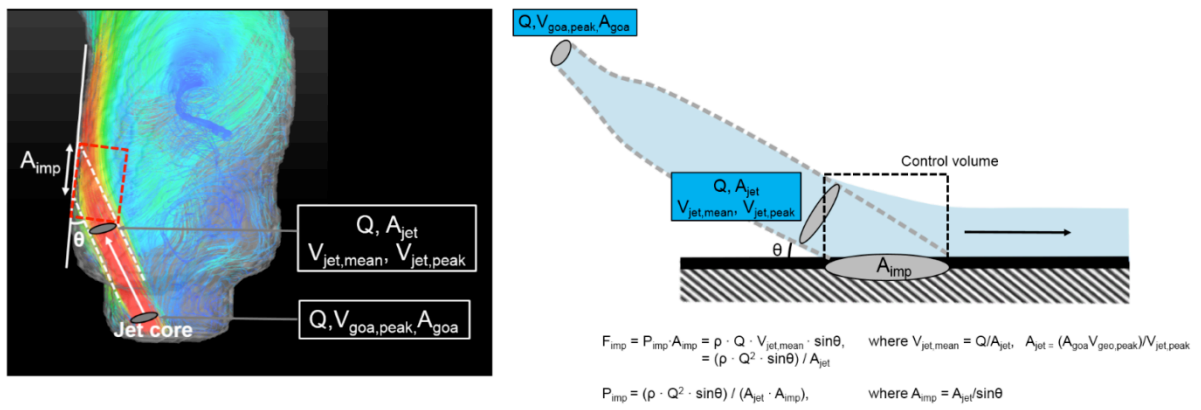

**Figure S3.** Schematic used to estimate impinging pressure.
